# Supplementary material for: New Fusion Transcripts Identified in Normal Karyotype Acute Myeloid Leukemia
Source: PubMed Central journal article supplement (PMC3520980; doi:10.1371/journal.pone.0051203), 2012-12-12

**Supplementary figure 2. Genomic patterns of fusion between partner genes.** Each fusion transcript sequence was mapped to hg18. The genomic region covering the two fusion partner genes was cut directly from the mapped genomic region to maintain the gene structure, orientation and distance between the fusion partners. The left arrow in dot lines is the end of 5' fusion transcript sequence and the right arrow is the beginning of the 3' fusion transcript sequence.

1. CIITA-DEXI

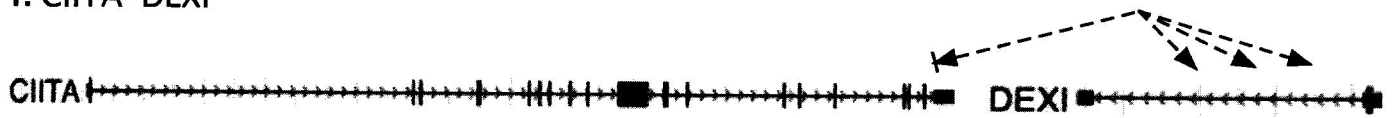

2. FAM65B-BC070382

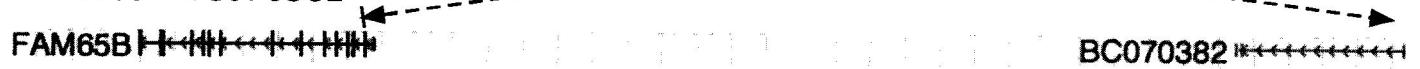

3. ARL13A-TRMT2B

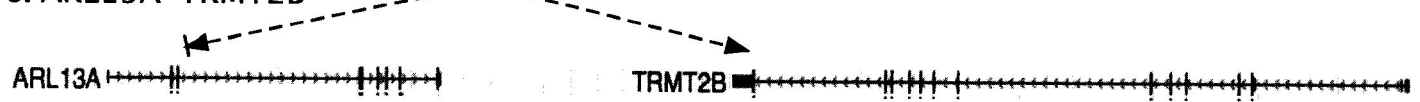

4. G3BP2-AK311578

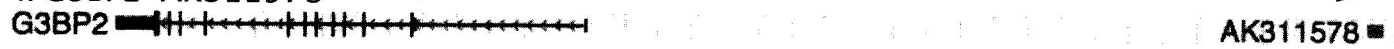

5. C2orf56-PRKD3

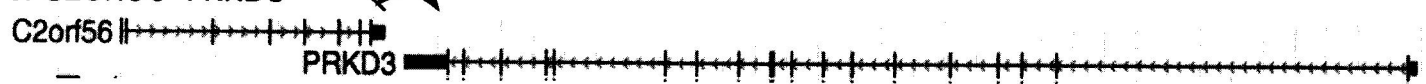

6. BC042152-AK024119

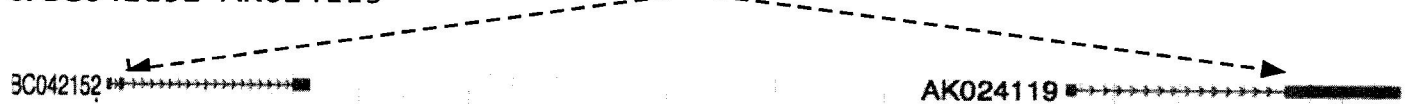

7. BC067907-MSN|MSN/ALK

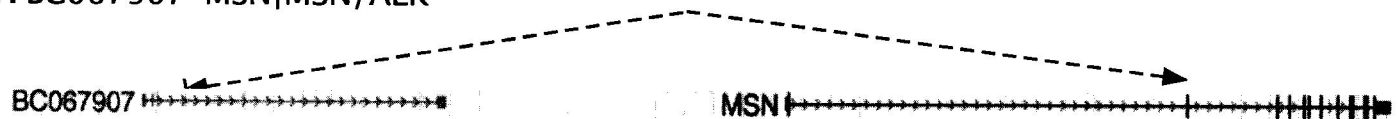

8. ARL17-KIAA1267

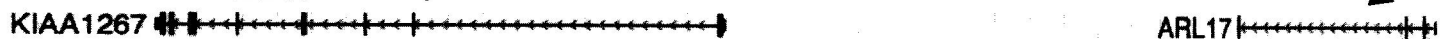

9. HARS2-ZMAT2

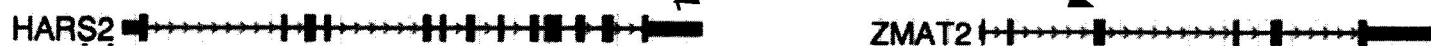

10. HSP90B1-DKFZp547P055

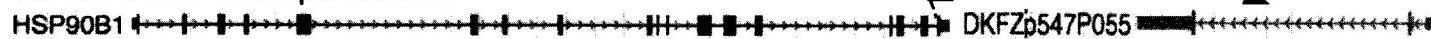

11. IL17RB-ACTR8

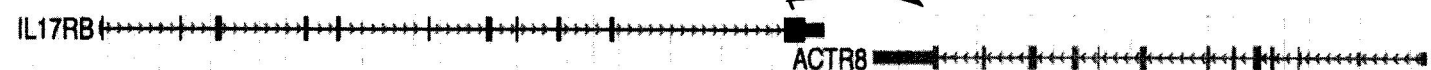

12. CNNM3-ANKRD23

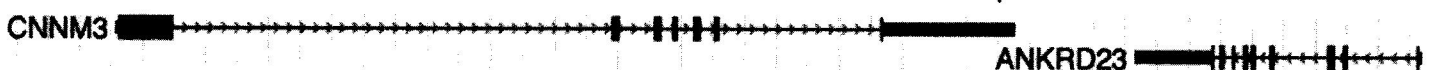

13. PPCS-LOC728621

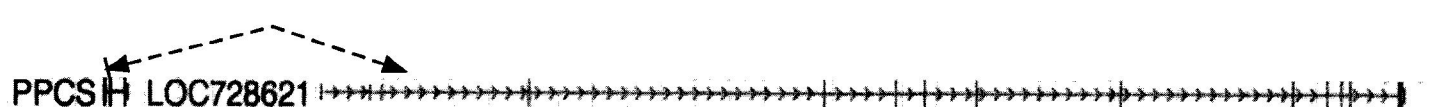

14. HERC3-FAM13AOS

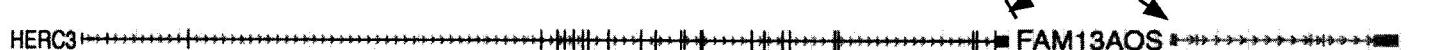

15. PAQR6-SMG5

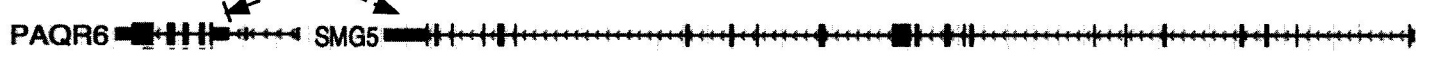

16. ZNF789-ZNF394

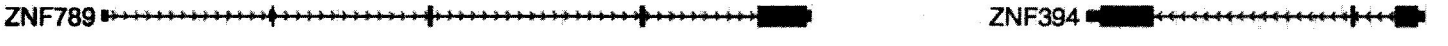

17. CLR-CLEC2D

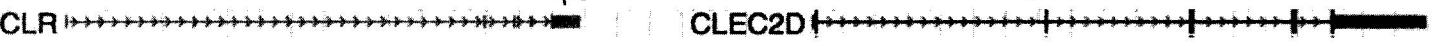

18. GGCT-BC041636

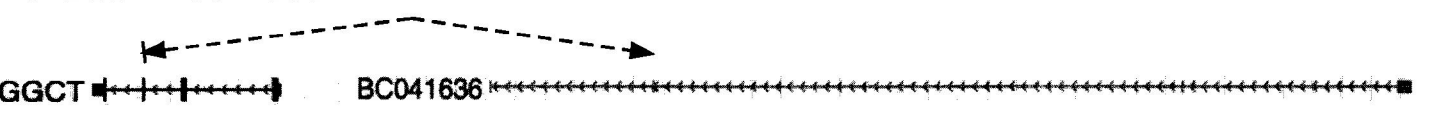

19. CLN5-FBXL3

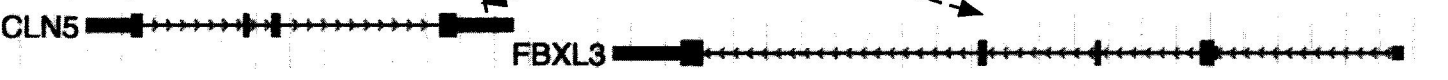

20. AGK-KIAA1147

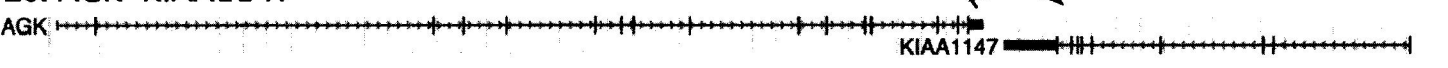

21. ZNRF2-DKFZP586I1420

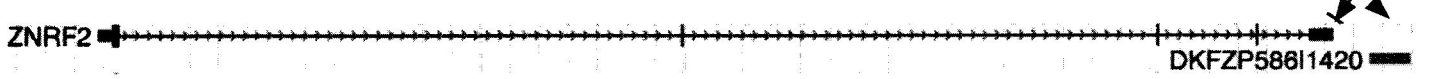

22. BC016361-EREG

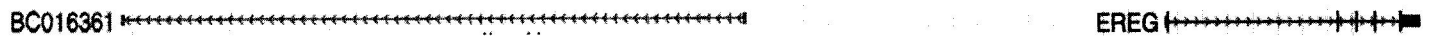

23. NFATC3-PLA2G15

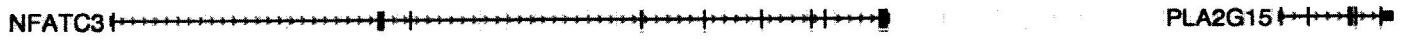

24. LY6G5C-ABHD16A

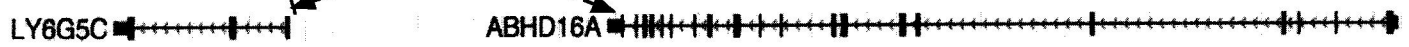

25. PLD4-AHNAK2

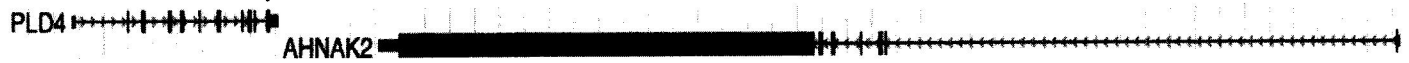

26. DHX8-ETV4

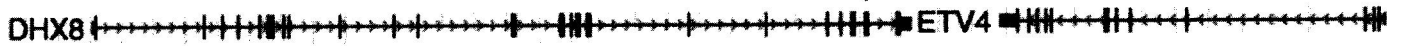

27. ATP5I-MFSD7

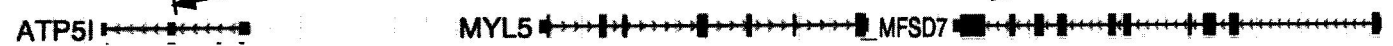

28. NUMB-AK055876

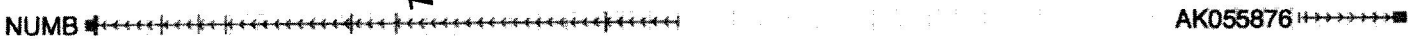

Supplement: pone.0051203.s002.pdf [file pone.0051203.s002.pdf]
