# Supplementary material for: New Fusion Transcripts Identified in Normal Karyotype Acute Myeloid Leukemia
Source: PubMed Central journal article supplement (PMC3520980; doi:10.1371/journal.pone.0051203), 2012-12-12
Supplement: pone.0051203.s001.pdf [file pone.0051203.s001.pdf]

Supplementary figure 1. RNAseq identified fusions.

CIITA-DEXI (bp1)

Tile 1: chr16:10924643-10924683  
Tile 2: chr16:10942544-10942584

|                                           |                                          |
|-------------------------------------------|------------------------------------------|
| CTGAGATGATCCCAGCTGTGCTCTGGACAGG           | GACAAGCGAGAATCCCCC                       |
| CGGATCAGCCTGAGATGATCCCAGCTGTGCTCTGGACAGG  | GACAAGCGA                                |
| GCCTGAGATGATCCCAGCTGTGCTCTGGACATG         | GACAAGCGAGAATCCC                         |
| ACTGAGATGATCCCAGCTGTGCTCTGGACAGG          | GACAAGCGAGAATCCCC                        |
| AGATGATCCCAGCTGTGCTCTGGACAGG              | GACAAGCGAGAATCCCCCAA                     |
| TCCCAGCTGTGCTCTGGACAGG                    | GACAAGCGAGAATCCCCCAAAGCCAA               |
| GGATCAGCCTGAGATGATCCCAGCTGTGCTCTGGACAGG   | GACAAGCGAG                               |
| TGATCCCAGCTGTGCTCTGGACAGG                 | GACAAGCGAGAATCCCCCAAAGC                  |
| GATGATCCCAGCTGTGCTCTGGACAGG               | GACAAGCGAGAATCCCCCAA                     |
| GCTGTGCTCTGGACAGG                         | GACAAGCGAGAATCCCCCAAAGCCAAGGTCA          |
| CGGCCTGAGATGACCCAGCTGTGCTCTGGACAGG        | GACAAGCGAGAATC                           |
| TGTGCNCTGGACAGG                           | GACAAGCGAGAATCCCCCAAAGCCAAGGTCATC        |
| ATCCCAGCTGTGCTCTGGACAGG                   | GACAAGCGAGAATCCCCCAAAGCCA                |
| TGAGATGATCCCAGCTGTGCTCTGGACAGG            | GACAAGCGAGAATCCCCCA                      |
| CTGTGCTCTGGACAGG                          | GACAAGCGAGAATCCCCCAAAGCCAAGGTCAT         |
| GCTCTGGACAGG                              | GACAAGCGAGAATCCCCCAAAGCCAAGGTCATCATC     |
| GATCAGCCTGAGATGATCCCAGCTGTGCTCTGGACAGG    | GACAAGCGAGAAT                            |
| ACGGATCAGCCTGAGATGATCCCAGCTGTGCTCTGGACAGG | GACAAGCGAG                               |
| TGCTCTGGACAGG                             | GACAAGCGAGAATCCCCCAAAGCCAAGGTCATCATCA    |
| GATCCCAGCTGTGCTCTGGACAGG                  | GACAAGCGAGAATCCCCCAAAGCCAA               |
| CCCAGCTGTGCTCTGGACAGG                     | GACAAGCGAGAATCCCCCAAAGCCAAGGT            |
| GAGATGATCCCAGCTGTGCTCTGGACAGG             | GACAAGCGAGAATCCCCCAA                     |
| TCAGCCTGAGATGATCCCAGCTGTGCTCTGGACAGG      | GACAAGCGAGAATCA                          |
| CTCTGGACAGG                               | GACAAGCGAGAATCCCCCAAAGCCAAGGTCATCATCAAG  |
| AGCTGTGCTCTGGACAGG                        | GACAAGCGAGAATCCCCCAAAGCCAAGGTCAT         |
| AGCCTGAGATGATCCCAGCTGTGCTCTGGACAGG        | GACAAGCGAGAATCCCA                        |
| ATGATCCCAGCTGTGCTCTGGACAGG                | GACAAGCGAGAATCCCCCAAAGCC                 |
| ACGGATCAGCCTGAGATGATCCCAGCTGTGCTCTGGACAGG | GACAAGCGAGAATCCCCCAAAGCCAAGGTCATCATCAAGC |

CIITA-DEXI (bp2)

Tile 1: chr16:10924643-10924683  
Tile 2: chr16:10936473-10936513

|                                           |                                           |
|-------------------------------------------|-------------------------------------------|
| GCTGTGCTCTGGACAGG                         | AGAAGGAAACCGAGGCTTAGGAGATGAAGTCT          |
| CGGATCAGCCTGAGATGATCCCAGCTGTGCTCTGGACAGG  | AGAAGGAAA                                 |
| GCAGCCGGAGATGATCCCAGCTGTGCTCTGGACAGG      | AGAAGGAAACCGA                             |
| CAGCCTGAGATGATCCCAGCTGTGCTCTGGACAGG       | AGAAGGAAACCGAG                            |
| TCTGGACAGG                                | AGAAGGAAACCGAGGCTTAGGAGATGAAGTCTGAGGTGT   |
| GATGATCCCAGCTGTGCTCTGGACAGG               | AGAAGGAAACCGAGGCTTAGGA                    |
| CTGAGATGATCCCAGCTGTGCTCTGGACAGG           | AGAAGGAAACCGAGGCTT                        |
| ATCAGCCTGAGATGATCCCAGCTGTGCTCTGGACAGG     | AGAAGGAAACCGAG                            |
| CTCTGGACAGG                               | AGAAGGAAACCGAGGCTTAGGAGATGAAGTCTGAGGTGTT  |
| GATCAGCCTGAGATGATCCCAGCTGTGCTCTGGACAGG    | AGAAGGAAACCGA                             |
| GGATCAGCCTGAGATGATCCCAGCTGTGCTCTGGACAGG   | AGAAGGAAACCGC                             |
| AGCTGTGCTCTGGACAGG                        | AGAAGGAAACCGAGGCTTAGGAGATGAAGTCTG         |
| AGCCTGAGATGATCCCAGCTGTGCTCTGGACAGG        | AGAAGGAAACCGAGGCT                         |
| CCTGAGATGATCCCAGCTGTGCTCTGGACAGG          | AGAAGGAAACCGAGGCTTA                       |
| AGATGATCCCAGCTGTGCTCTGGACAGG              | AGAAGGAAACCGAGGCTTAGGAG                   |
| TGATCCCAGCTGTGCTCTGGACAGG                 | AGAAGGAAACCGAGGCTTAGGAGATG                |
| TGAGATGATCCCAGCTGTGCTCTGGACAGG            | AGAAGGAAACCGAGGCTTAGG                     |
| CTGTGCTCTGGACAGG                          | AGAAGGAAACCGAGGCTTAGGAGATGAAGTCTGAG       |
| GAGATGATCCCAGCTGTGCTCTGGACAGG             | AGAAGGAAACCGAGGCTTAGGA                    |
| ATGATCCCAGCTGTGCTCTGGACAGG                | AGAAGGAAACCGAGGCTTAGGAGAA                 |
| CCAGCTGTGCTCTGGACAGG                      | AGAAGGAAACCGAGGCTTAGGAGATGAAGTC           |
| CCCAGCTGTGCTCTGGACAGG                     | AGAAGGAAACCGAGGCTTAGGAGAGAAGA             |
| ACGGATCAGCCTGAGATGATCCCAGCTGTGCTCTGGACAGG | AGAAGGAAACCGAGGCTTAGGAGATGAAGTCTGAGGTGTTG |

FAM65B-BC070382

Tile 1: chr6:24983983-24984024

Tile 2: chr6:25150057-25150098

|                                           |                                           |
|-------------------------------------------|-------------------------------------------|
| CGGGAGTCTGGTCGGTAGTC                      | GGTTGCGCTGGCGCCTCCGGATCCTGTCCCT           |
| CCGGGAGTCTGGTCGGTAGTC                     | GGTTGAGCTGGCGCCTCCGGATCCTGTCCC            |
| CTCCGGGAGTCTGGTCGGTAGTC                   | GGTTGAGCTGGCGCCTCCGGATCCTGTCT             |
| TTCCGGGAGTCTGGTCGGTAGTC                   | GGTTGAGCTGGCGCCTCCGGATCCTGTCT             |
| ATTTCCGGGAGTCTGGTCGGTAGTC                 | GGTTGAGCTGGCGCCTCCGGATCCTGT               |
| ACATGATTTCCGGGAGTCTGGTCGGTAGTC            | GGTTGAGCTGGCGCCTCCGGA                     |
| TACCAACATGATTTCCGGGAGTCTGGTCGGTAGTC       | GGTTGAGCTGGCGCCT                          |
| GTCCTGGTCGGTAGTC                          | GGTTGAGCTGGCGCCTCCGGATCCTGTCCCTCCATG      |
| CATGATTTCCGGGAGTCTGGTCGGTAGTC             | GGTTGAGCTGGCGCCTCCGGAT                    |
| CAACATGATTTCCGGGAGTCTGGTCGGTAGTC          | GGTTGAGCTGGCGCCTCCG                       |
| CGATCCTACCAACATGATTTCCGGGAGTCTGGTCGGTAGTC | GGTTGAGCTG                                |
| GTCGGTAGTC                                | GGTTGAGCTGGCGCCTCCGGATCCTGTCCCTCCATGGCCTG |
| GAGTCTGGTCGGTAGTC                         | GGTTGAGCTGGCGCCTCCGGATCCTGCCCTCCA         |
| ATGATTTCCGGGAGTCTGGTCGGTAGTC              | GGTTGAGCTGGCGCCTCCGGATC                   |
| CAACATGATTTCCGGGAGTCTGGTCGGTAGTC          | GGTTGAGCTGGCGCCTCCG                       |
| CCAACATGATTTCCGGGAGTCTGGTCGGTAGTC         | GGTTGAGCTGGCGCCTCC                        |
| TACCAACATGATTTCCGGGAGTCTGGTCGGTAGTC       | GGTTGAGCTGGCGCCT                          |
| ATCCTACCAACATGATTTCCGGGAGTCTGGTCGGTAGTC   | GGTTGAGCTGGC                              |
| GGATCCTACCAACATGATTTCCGGGAGTCTGGTCGGTAGTC | GGTTGAGCTGGCGCCTCCGGATCCTGTCCCTCCATGGCCTG |
| TTTCCGGGAGTCTGGTCGGTAGTC                  | GGTTGAGCTGGCGCCTCCGGATCCTGT               |
| GATTTCCGGGAGTCTGGTCGGTAGTC                | GGTTGAGCTGGCGCCTCCGGATCCT                 |
| ACATGATTTCCGGGAGTCTGGTCGGTAGTC            | GGTTGAGCTGGCGCCTCCGGA                     |
| AACATGATTTCCGGGAGTCTGGTCGGTAGTC           | GGTTGAGCTGGCGCCTCCGG                      |
| CCTACCAACATGATTTCCGGGAGTCTGGTCGGTAGTC     | GGTTGAGCTGGCGC                            |
| TCCGGGAGTCTGGTCGGTAGTC                    | GGTTGAGCTGGCGCCTCCGGATCCTGTCC             |
| ATTTCCGGGAGTCTGGTCGGTAGTC                 | GGTTGAGCTGGCGCCTCCGGATCCTGT               |
| CATGATTTCCGGGAGTCTGGTCGGTAGTC             | GGTTGAGCTGGCGCCTCCGGAT                    |
| CTCCGGGAGTCTGGTCGGTAGTC                   | GGTTGAGCTGGCGCCTCCGGATCCTGTCT             |
| CCAACATGATTTCCGGGAGTCTGGTCGGTAGTC         | GGTTGAGCTGGCGCCTCC                        |
| TTCCGGGAGTCTGGTCGGTAGTC                   | GGTTGAGCTGGCGCCTCCGGATCCTGTCT             |
| CGGGAGTCTGGTCGGTAGTC                      | GGTTGAGCTGGCGCCTCCGGATCCTGTCCCT           |
| CCGGGAGTCTGGTCGGTAGTC                     | GGTTGAGCTGGCGCCTCCGGATCCTGTCCC            |
| ATGATTTCCGGGAGTCTGGTCGGTAGTC              | GGTTGAGCTGGCGCCTCCGGATC                   |
| CCGGGAGTCTGGTCGGTAGTC                     | GGTTGAGCTGGCGCCTCCGGATCCTGTCCC            |
| CATGATTTCCGGGAGTCTGGTCGGTAGTC             | GGTTGAGCTGGCGCCTCCGGAT                    |
| TTCTACCAACATGATTTCCGGGAGTCTGGTCGGTAGTC    | GGTTGAGCTGGC                              |
| CGGGAGTCTGGTCGGTAGTC                      | GGTTGAGCTGGCGCCTCCGGATCCTGTCCCT           |
| CCGGGAGTCTGGTCGGTAGTC                     | GGTTGAGCTGGCGCCTCCGGATCCTGTCCC            |
| TCCGGGAGTCTGGTCGGTAGTC                    | GGTTGAGCTGGCGCCTCCGGATCCTGTCC             |
| TTCCGGGAGTCTGGTCGGTAGTC                   | GGTTGAGCTGGCGCCTCCGGATCCTGTCT             |
| GATTTCCGGGAGTCTGGTCGGTAGTC                | GGTTGAGCTGGCGCCTCCGGATCCT                 |
| ACATGATTTCCGGGAGTCTGGTCGGTAGTC            | GGTTGAGCTGGCGCCTCCGGA                     |
| CCTACCAACATGATTTCCGGGAGTCTGGTCGGTAGTC     | GGTTGAGCTGGCGC                            |
| GGAGTCTGGTCGGTAGTC                        | GGTTGAGCTGGCGCCTCCGGATCCTGTCCCTCC         |
| CCCGGGAGTCTGGTCGGTAGTC                    | GGTTGAGCTGGCGCCTCCGGATCCTGTCTCC           |
| TCCTACCAACATGATTTCCGGGAGTCTGGTCGGTAGTC    | GGTTGAGCTGGCG                             |
| ATTTCCGGGAGTCTGGTCGGTAGTC                 | GGTTGAGCTGGCGCCTCCGGATCCTGT               |
| ATCCTACCAACATGATTTCCGGGAGTCTGGTCGGTAGTC   | GGTTGAGCTGGC                              |
| CGGGAGTCTGGTCGGTAGTC                      | GGTTGAGCTGGCGCCTCCGGATCCTGTCCCT           |
| ACATGATTTCCGGGAGTCTGGTCGGTAGTC            | GGTTGAGCTGGCGCCTCCGGA                     |
| CTGCCAACATGATTTCCGGGAGTCTGGTCGGTAGTC      | GGTTGAGCTGGCGCCT                          |
| GGATCCTACCAACATGATTTCCGGGAGTCTGGTCGGTAGTC | GGTTGAGCTG                                |
| GGATCCTACCAACATGATTTCCGGGAGTCTGGTCGGTAGTC | GGTTGAGCTGGCGCCTCCGGATCCTGTCCCTCCATGGCCTG |

**ARL13A-TRMT2B**

Tile 1: chrX:100115327-100115366

Tile 2: chrX:100152166-100152205

|                                        |                                         |
|----------------------------------------|-----------------------------------------|
| GCTGCTCTTG                             | CCTGAAAGTTTCTGAAACTTCAGCCTTAACAAATAGCCT |
| TCCGGCTTTTGTCTCCTGCTGCTCTTG            | CCTGAAAGTTTCTGAAACTTC                   |
| CGGCTTTTGTCTCCTGCTGCTCTTG              | CCTGAAAGTTTCTGAAACTTCAG                 |
| GGCTTTTGTCTCCTGCTGCTCTTG               | CCTGAAAGTTTCTGAAACTTCAGC                |
| ATGAATCATGTTCCGGCTTTTGTCTCCTGCTGCTCTTG | CCTGAAAGTT                              |
| CCGGCTTTTGTCTCCTGCTGCTCTTG             | CCTGAAAGTTTCTGAAACTTCAGC                |
| CTTTTGTCTCCTGCTGCTCTTG                 | CCTGAAAGTTTCTGAAACTTCAGCCTTA            |
| TCCTGCTGCTCTTG                         | CCTGAAAGTTTCTGAAACTTCAGCCTTAACAAATAGC   |
| CTCCTGCTGCTCTTG                        | CCTGAAAGTTTCTGAAACTTCAGCCTTAACAAATA     |
| TTTTGTCTCCTGCTGCTCTTG                  | CCTGAAAGTTTCTGAAACTTCAGCCTTAA           |
| TTCCGGCTTTTGTCTCCTGCTGCTCTTG           | CCTGAAAGTTTCTGAAACTTCA                  |
| ATGAATCATGTTCCGGCTTTTGTCTCCTGCTGCTCTTG | CCTGAAAGTTTCTGAAACTTCAGCCTTAACAAATAGCCT |

**G3BP2-AK311578**

Tile 1: chr4:76806216-76806257

Tile 2: chr4:76868483-76868524

|                                          |                                            |
|------------------------------------------|--------------------------------------------|
| CTTCTCCATAACCATTCTTTGCTGCACAATGTCAAATG   | CTGTCACGTTGG                               |
| GGCTTCTCCATAACCATTCTTTGCTGCACAATGTCAAATG | CTGTCACGTT                                 |
| CTTTGCTGCACAATGTCAAATG                   | CTGTCACGTTGGCCAAAGGAAAATTTAC               |
| CTCCATAACCATTCTTTGCTGCACAATGTCAAATG      | CTGTCACGTTGGCCA                            |
| CATAACCATTCTTTGCTGCACAATGTCAAATG         | CTGTCACGTTGGCCAAAG                         |
| ATTTCTTTGCTGCACAATGTCAAATG               | CTGGTGTTTAGATCTAGGAATTCCT                  |
| GGCTTCTCCATAACCATTCTTTGCTGCACAATGTCAAATG | CTGGTGTTTAGATCTAGGAATTCCTTTTCAGCAGGTTTGAAG |

**C2orf56-PRKD3**

Tile 1: chr2:37329032-37329073

Tile 2: chr2:37333732-37333773

|                                           |                                           |
|-------------------------------------------|-------------------------------------------|
| TCATATACTGCAG                             | CACTGCAGATGACAATCTACGAAGAACAAGTTACACAG    |
| AGGAAACACATTTTCATATACTGCAG                | CACTGCAGATGACAATCTACGAAGAA                |
| CAAGAAATCAAATAAAGGAAACACATTTTCATATACTGCAG | CACTGCAGATGACAATCTACGAAGAACAAGTTACACAGCAA |
| TATACTGCAG                                | CACTGCAGATGACAACCTACGAAGAACAAGTTACACAGCAA |
| ATATACTGCAG                               | CACTGCAGATGACAATCTACGAAGAACAAGTTACACAGCA  |
| CACATTTTCATATACTGCAG                      | CACTGCAGATGACAATCTACGAAGAACAAGTT          |
| ACACATTTTCATATACTGCAG                     | CACTGCAGATGACAATCTACGAAGAACAAGT           |
| TAAAGGAAACACATTTTCATATACTGCAG             | CACTGCAGATGACAATCTACGAA                   |
| AATCAAATAAAGGAAACACATTTTCATATACTGCAG      | CACTGCAGATGACAA                           |
| AGAAATCAAATAAAGGAAACACATTTTCATATACTGCAG   | CACTGCAGATGA                              |
| AACACATTTTCATATACTGCAG                    | CACTGCAGATGACAATCTACGAAGAACAAG            |
| AAGAAATCAAATAAAGGAAACACATTTTCATATACTGCAG  | CACTGCAGATG                               |
| GAAACACATTTTCATATACTGCAG                  | CACTGCAGATGACAATCTACGAAGAACA              |
| CAAGAAATCAAATAAAGGAAACACATTTTCATATACTGCAG | CACTGCAGATGACAATCTACGAAGAACAAGTTACACAGCAA |

**BC042152-AK024119**

Tile 1: chr19:47328979-47329020

Tile 2: chr19:47351698-47351739

|                                           |                                           |
|-------------------------------------------|-------------------------------------------|
| ATCAAGCAAGCCCTGCGCCTATCTGCAG              | GCCGGATCTCTGGATCTCCCCAG                   |
| CGCAAGCCCTGCGCCTATCTGCAG                  | GCCGGATCTCTGGATCTCCCCAGCCTC               |
| GGAAGATCAAGCAAGCCCTGCGCCTATCTGCAG         | GCCGGATCTCTGGATCTC                        |
| CGCGGCAGGGAAGATCAAGCAAGCCCTGCGCCTATCTGCAG | GCCGGATCTCTGGATCTCCCCAGCCTCCAGATCTCAGTGTG |

**BC067907-MSN**

Tile 1: chrX:64725176-64725217  
Tile 2: chrX:64853404-64853445

|                                           |                                           |
|-------------------------------------------|-------------------------------------------|
| GCAAAACAACCAA                             | ATCAGTGTGCGTGTGACCACCATGGATGCAGAGCTGGA    |
| ACCATGCAAAACACCCAA                        | ATCAGTGTGCGTGTGACCACCATGGATGCAGAG         |
| CTTAACTGCCAGTGTTCGTGGACCATGCAAAACAACCAA   | ATCAGTGTGCGT                              |
| CCCTTAACTGCCAGTGTTCGTGGACCATGCAAAACAACCAA | ATCAGTGTGCGTGTGACCACCATGGATGCAGAGCTGGAGTT |
| C AAAACAACCAA                             | ATCAGTGTGCGTGTGACCACCATGGATGCAGAGCTGGAG   |
| CCCTTAACTGCCAGTGTTCGTGGACCATGCAAAACAACCAA | ATCAGTGTGCGTGTGACCACCATGGATGCAGAGCTGGAGTT |
| GGACCATGCAAAACAACCAA                      | ATCAGTGTGCGTGTGACCACCATGGATGCAG           |
| GTTTCGTGGACCATGCAAAACAACCAA               | ATCAGTGTGCGTGTGACCACCATGG                 |
| ACCATGCAAAACAACCAA                        | ATCAGTGTGCGTGTGACCACCATGGATGCAGAG         |
| CGTGGACCATGCAAAACAACCAA                   | ATCAGTGTGCGTGTGACCACCATGGATG              |
| CCAGTGTTCGTGGACCATGCAAAACAACCAA           | ATCAGTGTGCGTGTGACCAC                      |
| C AAAACAACCAA                             | ATCAGTGTGCGTGTGACCACCATGGATGCAGAGCTGGAG   |
| CCATGCAAAACAACCAA                         | ATCAGTGTGCGTGTGACCACCATGGATGCAGAGC        |
| TTCGTGGACCATGCAAAACAACCAA                 | ATCAGTGTGCGTGTGACCACCATGGA                |
| TGTTTCGTGGACCATGCAAAACAACCAA              | ATCAGTGTGCGTGTGACCACCATG                  |
| CCCTTAACTGCCAGTGTTCGTGGACCATGCAAAACAACCAA | ATCAGTGTGCGTGTGACCACCATGGATGCAGAGCTGGAGTT |

**KIAA1267-ARL17**

Tile 1: chr17:41786010-41786051  
Tile 2: chr17:41527741-41527782

|                                          |                                           |
|------------------------------------------|-------------------------------------------|
| TCTCCACACAGAAA                           | CCTTATTAGCACGTATCTGTTTGTAAATGTCTGTTTG     |
| TATATTCTACTGTCTCCACACAGAAA               | CCTTATTAGCACGTATCTGTTTGTAA                |
| TTTTATTTCTACTGTCTCCACACAGAAA             | CCTTATTAGCACGTATCTGTTTG                   |
| CGAAGGTGTTATTTTTATTTCTACTGTCTCCACACAGAAA | CCTTATTAGC                                |
| ACTGTCTCCACACAGAAA                       | CCTTATTAGCACGTATCTGTTTGTAAATGTCTG         |
| GAAGGTGTTATTTTTATTTCTACTGTCTCCACACAGAAA  | CCTTATTAGCA                               |
| CGAAGGTGTTATTTTTATTTCTACTGTCTCCACACAGAAA | CCTTATTAGCACGTATCTGTTTGTAAATGTCTGTTTGCTGA |

**HARS2-ZMAT2**

Tile 1: chr5:140058558-140058599  
Tile 2: chr5:140060586-140060627

|                                           |                                           |
|-------------------------------------------|-------------------------------------------|
| ATTTGAAGTGCCACGGAACGTTGTCAAGA             | GACAAAAAACTTGGACTTTCGC                    |
| ACGGAACGTTGTCAAGA                         | GACAAAAAACTTGGACTTTCGCCGAAAGTGGGAC        |
| CCACGGAACGTTGTCAAGA                       | GACAAAAAACTTGGACTTTCGCCGAAAGTGGG          |
| GCCACGGAACGTTGTCAAGA                      | GACAAAAAACTTGGACTTTCGCCGAAAGTGG           |
| GGCAAATTTGAAGTGCCACGGAACGTTGTCAAGA        | GACAAAAAACTTGGACT                         |
| AGTGCCACGGAACGTTGTCAAGA                   | GACAAAAAACTTGGACTTTCGCCGAAAG              |
| CTGCAGAGGCAAATTTGAAGTGCCACGGAACGTTGTCAAGA | GACAAAAAACTTGGACTTTCGCCGAAAGTGGGACAAAGATG |

**HSP90B1-DKFzP547P055**

Tile 1: chr12:102865296-102865337  
Tile 2: chr12:102871292-102871333

|                                           |                                           |
|-------------------------------------------|-------------------------------------------|
| CAGATGAAGGAGAAGAAACAGCAAA                 | GATGAGCTGAGCTGGACAACATAAAG                |
| AACAGATGAAGAAGAAGAAACAGCAAA               | GATGAGCTGAGCTGGACAACATAA                  |
| GGGAACAGATGAAGAAGAAGAAACAGCAAA            | GATGAGCTGAGCTGGACAAC                      |
| GAAATGGATGTGGGAACAGATGAAGAAGAAGAAACAGCAAA | GATGAGCTGA                                |
| GAAATGGATGTGGGAACAGATGAAGAAGAAGAAACAGCAAA | GATGAGCTGAGCTGGACAACATAAAGCACCTGTAGCAGTTC |

**IL17RB-ACR8**

Tile 1: chr3:53874044-53874085  
Tile 2: chr3:53877739-53877780

|                                          |                                            |
|------------------------------------------|--------------------------------------------|
| CAGTGTGTGCGATGGTA                        | CCAAGAAGCTTGTTTTTGGTCTTCGGCAGTGACA         |
| CAACAGTGTGTGCGATGGTA                     | CCAAGAAGCTTGTTTTTGGTCTTCGGCAGTG            |
| GTCAACAGTGTGTGCGATGGTA                   | CCAAGAAGCTTGTTTTTGGTCTTCGGCAG              |
| GTGCGATGGTA                              | CCAAGAAGCTTGTTTTTGGTCTTCGGCAGTGACATTTCCCT  |
| TGTGCGATGGTA                             | CCAAGAAGCTTGTTTTTGGTCTTCGGCAGTGACATTTCC    |
| TCCTTCTTTCCAATGACGTCAACAGTGTGTGCGATGGTA  | CCAAGAAGCTTG                               |
| CGTCAACAGTGTGTGCGATGGTA                  | CCAAGAAGCTTGTTTTTGGTCTTCGGCA               |
| CTTCTTTCCAATGACGTCAACAGTGTGTGCGATGGTA    | CCAAGAAGCTTGTT                             |
| CTTCTTCTTTCCAATGACGTCAACAGTGTGTGCGATGGTA | CCAAGAAGCTTGTTTTTGGTCTTCGGCAGTGACATTTCCCTC |

**ANKRD23-CNNM3**

Tile 1: chr2:96862966-96863007  
Tile 2: chr2:96869463-96869504

|                                           |                                           |
|-------------------------------------------|-------------------------------------------|
| CCAGGTGGATCCTCTT                          | ATCCTGTGCGTTCAGGTGGGCGCCACACTCGATGA       |
| AGAGCAGTGAGGGAGGGTTCATGAACCAGGTGGATCCTCTT | ATCCTGTGCG                                |
| AGAGCAGTGAGGGAGGGTTCATGAACCAGGTGGATCCTCTT | ATCCTGTGCGTTCAGGTGGGCGCCACACTCGATGAGGTGCT |

**PPCS-LOC728621**

Tile 1: chr1:42695568-42695609  
Tile 2: chr1:42711380-42711421

|                                           |                                           |
|-------------------------------------------|-------------------------------------------|
| CATCTGGGGGCCCACTGCAGG                     | GAAAAGTTCAGTTAGAAGACATACTTCACC            |
| CAAGATCCAGTCATCTGGGGGCCCACTGCAGG          | GAAAAGTTCAGTTAGAAGA                       |
| ACAAGATCCAGTCATCTGGGGGCCCACTGCAGG         | GAAAAGTTCAGTTAGAAG                        |
| GCCTGAACACAAGATCCAGTCATCTGGGGGCCCACTGCAGG | GAAAAGTTCAGTTAGAAGACATACTTCACCATCTTGAAAAA |

**HERC3-FAM13AOS**

Tile 1: chr4:89848392-89848433  
Tile 2: chr4:89850282-89850323

|                                          |                                             |
|------------------------------------------|---------------------------------------------|
| AAGAATCCAT                               | CCCTTTACAGAAAACAACACTGACCAATCCTTATGAGACCAGA |
| AAAGAATCCAT                              | CCCTTTACAGAAAACAACACTGACCAATCCTTATGAGACCAG  |
| AAAGAATCCAT                              | CCCTTTACAGAAAACAACACTGACCAATCCTTATGAGACCAG  |
| GAAAATTCTACATGATTAAGAATCCAT              | CCCTTTACAGAAAACAACACTGACC                   |
| AGAAAATTCTACATGATTAAGAATCCAT             | CCCTTTACAGAAAACAACACTGAC                    |
| TAAAGAATCCAT                             | CCCTTTACAGAAAACAACACTGACCAATCCTTATGAGACCG   |
| ATTAAAGAATCCAT                           | CCCTTTACAGAAAACAACACTGACCAATCCTTATGAGAC     |
| ATTCTACATGATTAAGAATCCAT                  | CCCTTTACAGAAAACAACACTGACCAATC               |
| AAATTCTACATGATTAAGAATCCAT                | CCCTTTACAGAAAACAACACTGACCAA                 |
| GGAGTAAGAAAATTCTACATGATTAAGAATCCAT       | CCCTTTACAGAAAACA                            |
| CTACATGATTAAGAATCCAT                     | CCCTTTACAGAAAACAACACTGACCAATCCTT            |
| TACATGATTAAGAATCCAT                      | CCCTTTACAGAAAACAACACTGACCAATCCTTA           |
| CATCATGGAGTAAGAAAATTCTACATGATTAAGAATCCAT | CCCTTTACAGAAAACAACACTGACCAATCCTTATGAGACCAGA |

**PAQR6-SMG5**

Tile 1: chr1:154483129-154483170  
Tile 2: chr1:154485982-154486023

|                                           |                                            |
|-------------------------------------------|--------------------------------------------|
| GGTACCTCCACGTTGA                          | CCTCAACACTCCAAAAGCCAGCCCCCTTCAGGTCTT       |
| GCTTGAGACTGAGCATGGTGGCCTGGTACCTCCACGTTGA  | CCTCAACACTC                                |
| TCCACGTTGA                                | CCTCAACACTCCAAAAGCCAGCCCCCTTCAGGTCTTCAGTCC |
| TGAGCATGGTGGCCTGGTACCTCCACGTTGA           | CCTCAACACTCCAAAAGCCA                       |
| GAGCATGGTGGCCTGGTACCTCCACGTTGA            | CCTCAACACTCCAAAAGCCAG                      |
| AGCTTGAGACTGAGCATGGTGGCCTGGTACCTCCACGTTGA | CCTCAACACTCCAAAAGCCAGCCCCCTTCAGGTCTTCAGTCC |

**ZNF789-ZNF394**

Tile 1: chr7:98922479-98922520  
Tile 2: chr7:98934272-98934313

|                                             |                                           |
|---------------------------------------------|-------------------------------------------|
| CTCTTACGGTCCATAAACAGTGTC                    | ACTCGGCGGAAGTGTGCTCCCGGAATC               |
| TTACGGTCCATAAACAGTGTC                       | ACTCGGCGGAAGTGTGCTCCCGGAATCCTT            |
| TCAGCTCTTACGGTCCATAAACAGTGTC                | ACTCGGCGGAAGTGTGCTCCCGG                   |
| C TTCAGACAGCGGT CAGCTCTTACGGTCCATAAACAGTGTC | ACTCGGCGGAAGTGTGCTCCCGGAATCCTTCTGCGCACTCT |

**CLR-CLEC2D**

Tile 1: chr12:9700978-9701019  
Tile 2: chr12:9724785-9724826

|                                         |                                           |
|-----------------------------------------|-------------------------------------------|
| AGCAGCTTCCACCATGCCCTGGAAAACT            | GTTGTCTGCATTCAAAAGAGC                     |
| ATCAGCAGCAGCTTCCACCATGCCCTGGAAAACT      | GTTGTCTGCATTCAA                           |
| GTGGAATCAGCAGCAGCTTCCACCATGCCCTGGAAAACT | CAATAAGAGC                                |
| GTGGAATCAGCAGCAGCTTCCACCATGCCCTGGAAAACT | CAATAAGAGCTAACTGCCATCAAGAGCCATCAGTATGTCTT |

**GGCT-BC041636**

Tile 1: chr7:30506780-30506821  
Tile 2: chr7:30530506-30530547

|                                          |                                           |
|------------------------------------------|-------------------------------------------|
| GGGAATTGCCAAAGTCAAGCTTAAAT               | CATCCTCAGGTGAGTGGCAACCAC                  |
| TGGGAATTGCCAAAGTCAAGCTTAAAT              | CATCCTCAGGTGAGTGGCAACCA                   |
| CTTGGGAATTGCCAAAGTCAAGCTTAAAT            | CATCCTCAGGTGAGTGGCAAC                     |
| ACTTGTTTTGCCTTGGGAATTGCCAAAGTCAAGCTTAAAT | CATCCTCAGGTGAGTGGCAACCACCAGAAGTGGCTGTTTCA |

**CLN5-FBXL3**

Tile 1: chr13:76474145-76474186  
Tile 2: chr13:76487545-76487586

|                                          |                                            |
|------------------------------------------|--------------------------------------------|
| TGATGATCAACTGAACACGTTTC                  | TGCTGGAGAGACATGAGGACAGCTGCTC               |
| CGTCCTTTAAGTATTTGATGATCAACTGAACACGTTTC   | TGCTGGAGAGACA                              |
| ACTGAACACGTTTC                           | TGCTGGAGAGACATGAGGACAGCTGCTCATTTTTCAAC     |
| TTGATGATCAACTGAACACGTTTC                 | TGCTGGAGAGACATGAGGACAGCTGCT                |
| GTATTTGATGATCAACTGAACACGTTTC             | TGCTGGAGAGACATGAGGACAGC                    |
| CAAGGTCTTTAAGTATTTGATGATCAACTGAACACGTTTC | TGCTGGAGAGACATGAGGACAGCTGCTCATTTTTCAACAGCT |

**AGK-KIAA1147**

Tile 1: chr7:140999111-140999152  
Tile 2: chr7:141010440-141010481

|                                           |                                           |
|-------------------------------------------|-------------------------------------------|
| GGGAGCTGCAGTTCTTCTGTGATC                  | AGCACGAAGAGGTCTCTTCAACAAGG                |
| AGCTGCAGTTCTTCTGTGATC                     | AGCACGAAGAGGTCTCTTCAACAAGGGTTG            |
| GGTGAAACTGCTCCCCAGGAAGCTGCAGTTCTTCTGTGATC | AGCACGAAGAGGTCTCTTCAACAAGGGTTGTAGTCTTCTTC |

**ZNRF2-DKFZP586I1420**

Tile 1: chr7:30372398-30372437  
Tile 2: chr7:30377094-30377133

|                                        |                                          |
|----------------------------------------|------------------------------------------|
| GTCATCTACATAG                          | GTATTTTCCTGTTAAATAAGATATCAAAAGCATCAATC   |
| CTTAATAGTCATCTACATAG                   | GTATTTTCCTGTTAAATAAGATATCAAAAGC          |
| ATAGTCATCTACATAG                       | GTATTTTCCTGTTAAATAAGATATCAAAAGCATCA      |
| CCCTTAATAGTCATCTACATAG                 | GTATTTTCCTGTTAAATAAGATATCAAAA            |
| TGAAAATGCTGCACATCCCTTAATAGTCATCTACATAG | GTATTTTCCTGTTAAATAAGATATCAAAAGCATCAATCAC |

**BC016361-EREG**

Tile 1: chr4:75414846-75414885  
Tile 2: chr4:75449731-75449770

AAAGGGAGACCTCATCT CTGATATTTCCAGTGTGACAGGGACACAGCCA  
TGGGCAACAAGGGAGACCTCATCT CTGATATTTCCAGTGTGACAGGGA  
AATTCAGACCAGCTGGGCAACAAGGGAGACCTCATCT CTGATATTTCCAGTGTGACAGGGACACAGCCAACGTGGG

**NFATC3-PLA2G15**

Tile 1: chr16:66783137-66783178  
Tile 2: chr16:66840692-66840733

TTTAGATGAT GTCCCTGGTGATTTGGGTAACCAACTGGAAGCCAAGCTGGA  
CATCACTTTAGATGAT GTCCCTGGTGATTTGGGTAACCAACTGGAAGCCAA  
ACTTTGCAACCATTGGTCTGCAGGACATCACTTTAGATGAT GTCCCTGGTGATTTGGGTAACCAACTGGAAGCCAAGCTGGA

**LY6G5C-ABHD16A**

Tile 1: chr6:31759055-31759096  
Tile 2: chr6:31762934-31762975

GAGTGCTCCTA CCCCATTCTTCCATAATGAGTCCCAGTTGGTCCCTAGAGG  
ACGGTGCTCCCTTCTGAGTGCTCCTA CCCCATTCTTCCATAATGAGTCCCAG  
ATGACGGTGCTCCCTTCTGAGTGCTCCTA CCCCATTCTTCCATAATGAGTCC  
GCGACAGCAGCAGATGACGGTGCTCCCTTCTGAGTGCTCCTA CCCCATTCTTCCATAATGAGTCCCAGTTGGTCCCTAGAGGT

**PLD4-AHNAK2**

Tile 1: chr14:104469693-104469734  
Tile 2: chr14:104474544-104474585

GCAAGTTCATGGTCACGGAGAAGGCAGCCTACA TAGAGCTGCTTAGTAGAG  
ATGGTCACGGAGAAGGCAGCCTACA TAGAGCTGCTTAGTAGAGACCAGGAG  
GTTTCATGGTCACGGAGAAGGCAGCCTACA TAGAGCTGCTTAGTAGAGACCA  
CACCACAGCAAGTTCATGGTCACGGAGAAGGCAGCCTACA TAGAGCTGCTT  
GAACCACAGCAAGTTCATGGTCACGGAGAAGGCAGCCTACA TAGAGCTGCTTAGTAGAGACCAGGAGTGTGTGGGAGGAAAG

**DHX8-ETV4**

Tile 1: chr17:38957039-38957080  
Tile 2: chr17:38969306-38969347

CTTGTGCAGGACATGG GACCTCTACTCACGGTTTTCTGAATGGAATCAG  
GTGGGTGAGCATCTTGTGCAGGACATGG GACCTCTACTCACGGTTTTCTG  
TGGGAAGGTGGAGTGGGTGAGCATCTTGTGCAGGACATGG GACCTCTACTCACGGTTTTCTGAATGGAATCAGGAACAAA

**ATP5I-MFSD7**

Tile 1: chr4:657152-657193  
Tile 2: chr4:666572-666613

AGGTAATCTG TCCAGTCAAGTGGATCCTCCCCCTGCTGGCAGGTGGACAAG  
TAGGTAATCTG TCCAGTCAAGTGGATCCTCCCCCTGCTGGCAGGTGGACAA  
TATCCTCCTCCTCTTCTGCCGAGGTTTTAGGTAATCTG TCCAGTCAAGTGGATCCTCCCCCTGCTGGCAGGTGGACAAG

**NUMB-AK055876**

Tile 1: chr14:72999086-72999127  
Tile 2: chr14:72892088-72892129

CCAAGGTACT TAACCGGGAAGCTACATTTTCCGGTGCGAACGCCTTCTTCA  
GGCCAAGGTACT TAACCGGGAAGCTACATTTTCCGGTGCGAACGCCTTCTT  
CGGGAAGTGCCACGCTGCTTCCACGCTGGAACAAGGTACT TAACCGGGAAGCTACATTTTCCGGTGCGAACGCCTTCTTCA
